# Supplementary material for: Single-cell analysis reveals a kynurenine pathway enriched epithelial subpopulation and a HAAO/QA-FDPS metabolic axis in prostate cancer
Source: Research Square preprint supplement (doi:10.21203/rs.3.rs-8462205/v1), 2026-01-29
Supplement: Supplementary file 1 [file 3088b934ea6fc320a08d9a8b.docx]

Supplementary materials for

**Single-cell analysis reveals a kynurenine pathway enriched epithelial subpopulation and a HAAO/QA-FDPS metabolic axis in prostate cancer**

Hongchang Zhang *et al*.

*Correspondence:

**CONTENTS**

**Figure. S1-S6**

**Tables. S1 to S6**

**Figure S1**

**
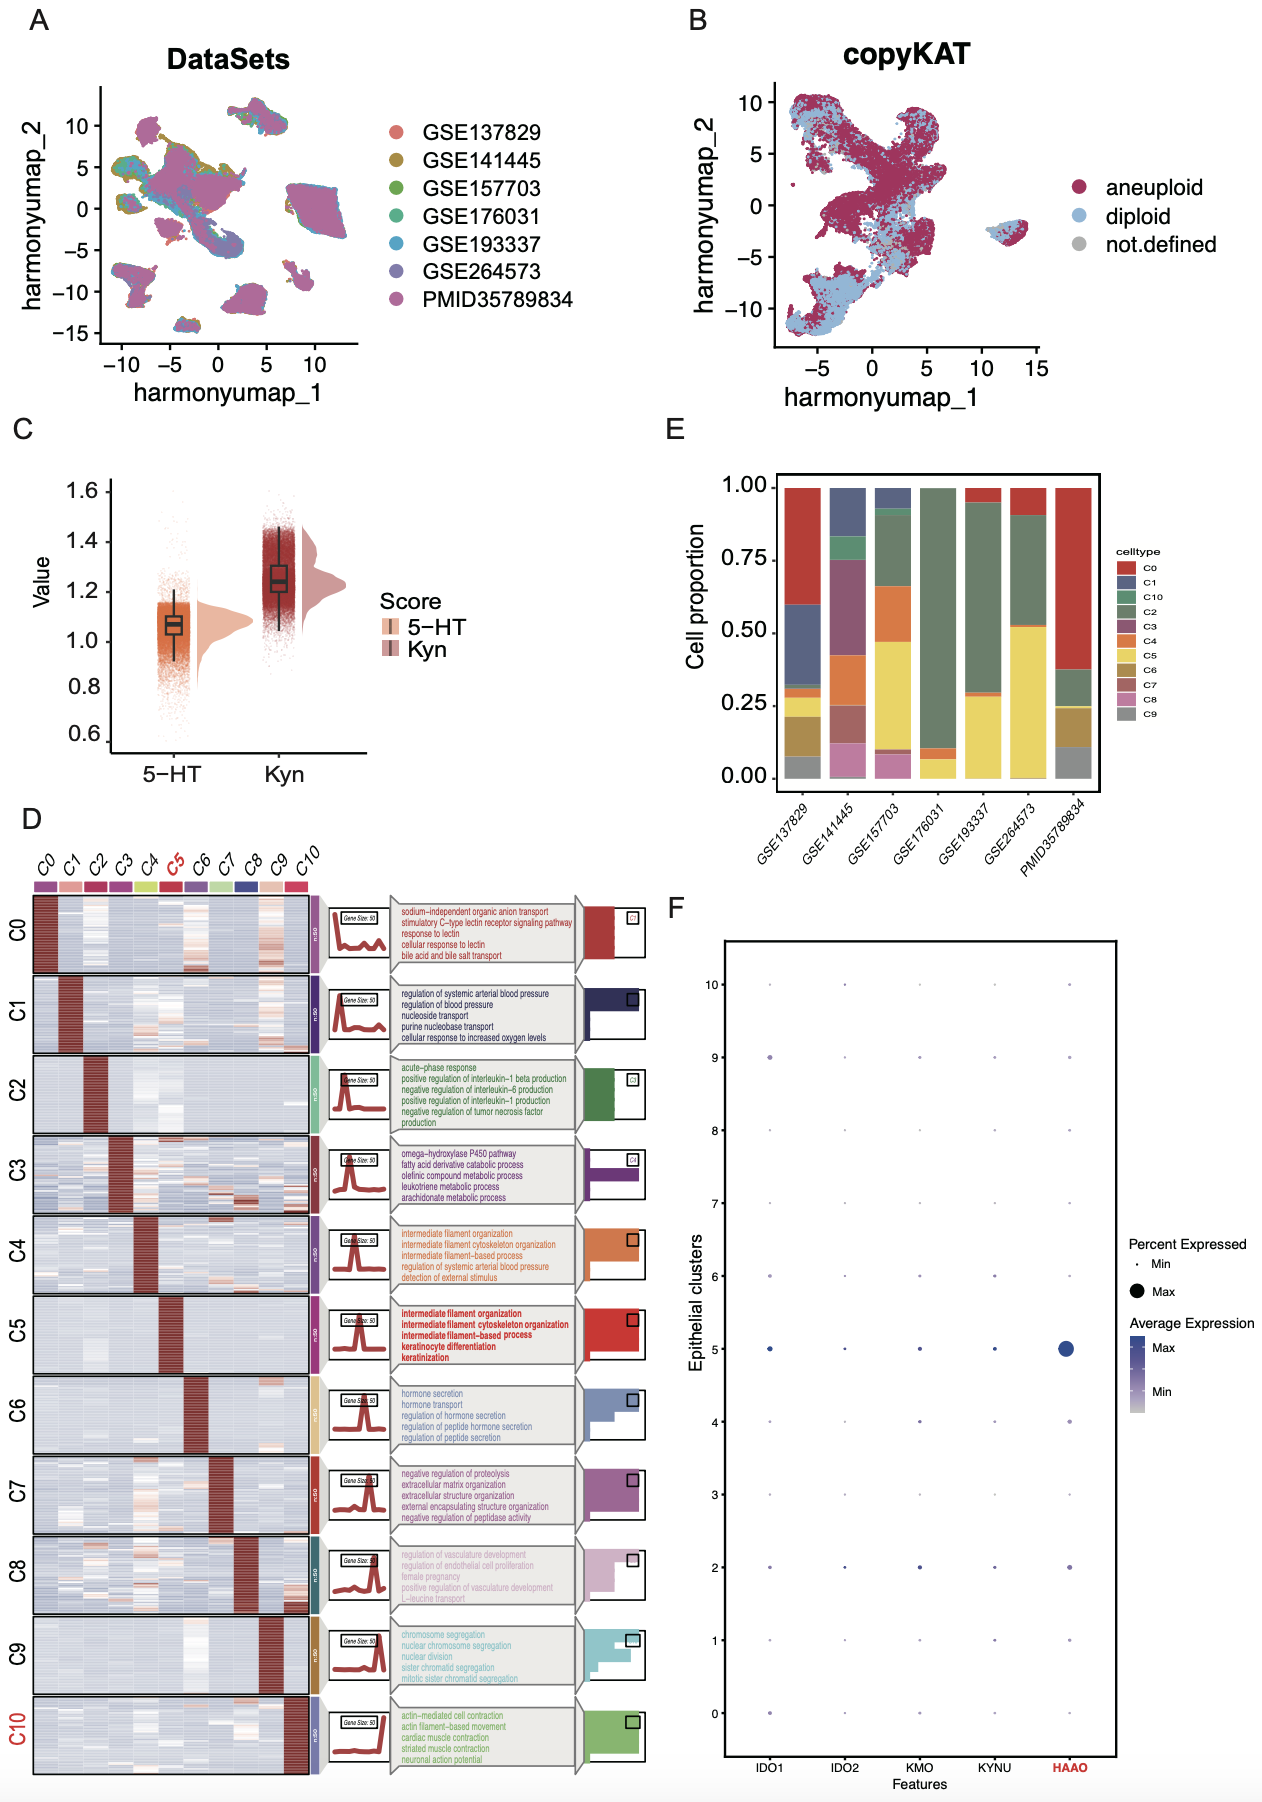
**

**Figure S1. Single-cell transcriptomic landscape and kynurenine pathway activity across malignant epithelial cells.** **(A)** Integrated analysis of 123,986 cells from 7 published human scRNA-seq datasets. **(B)** UMAP plot showing the aneuploid, diploid and not defined epithelial cells in = prostate cancer tissues. **(C)** UMAP plot showing the activity distribution of the kynurenine and 5-HT pathways in aneuploid epithelial cells, with pathway activity scores quantified using GSVA. **(D)** Box plot showing the GSVA scores of the kynurenine and 5-HT pathways in malignant cells. Wilcoxon rank-sum test used for comparison, ***p < 0.001. **(E)** Violin plot showing the expression levels of kynurenine and 5-HT pathways in each malignant cluster, with “Diff” representing Kyn minus 5-HT. **(F)** Stacked bar plot showing the distribution proportions of malignant epithelial clusters across various datasets. (G) KEGG analysis showing the top five enriched pathways for each malignant epithelial cluster. (H) Bubble plot showing the expression levels of kynurenine pathway genes in the C5 cluster.

**Figure S2**

**
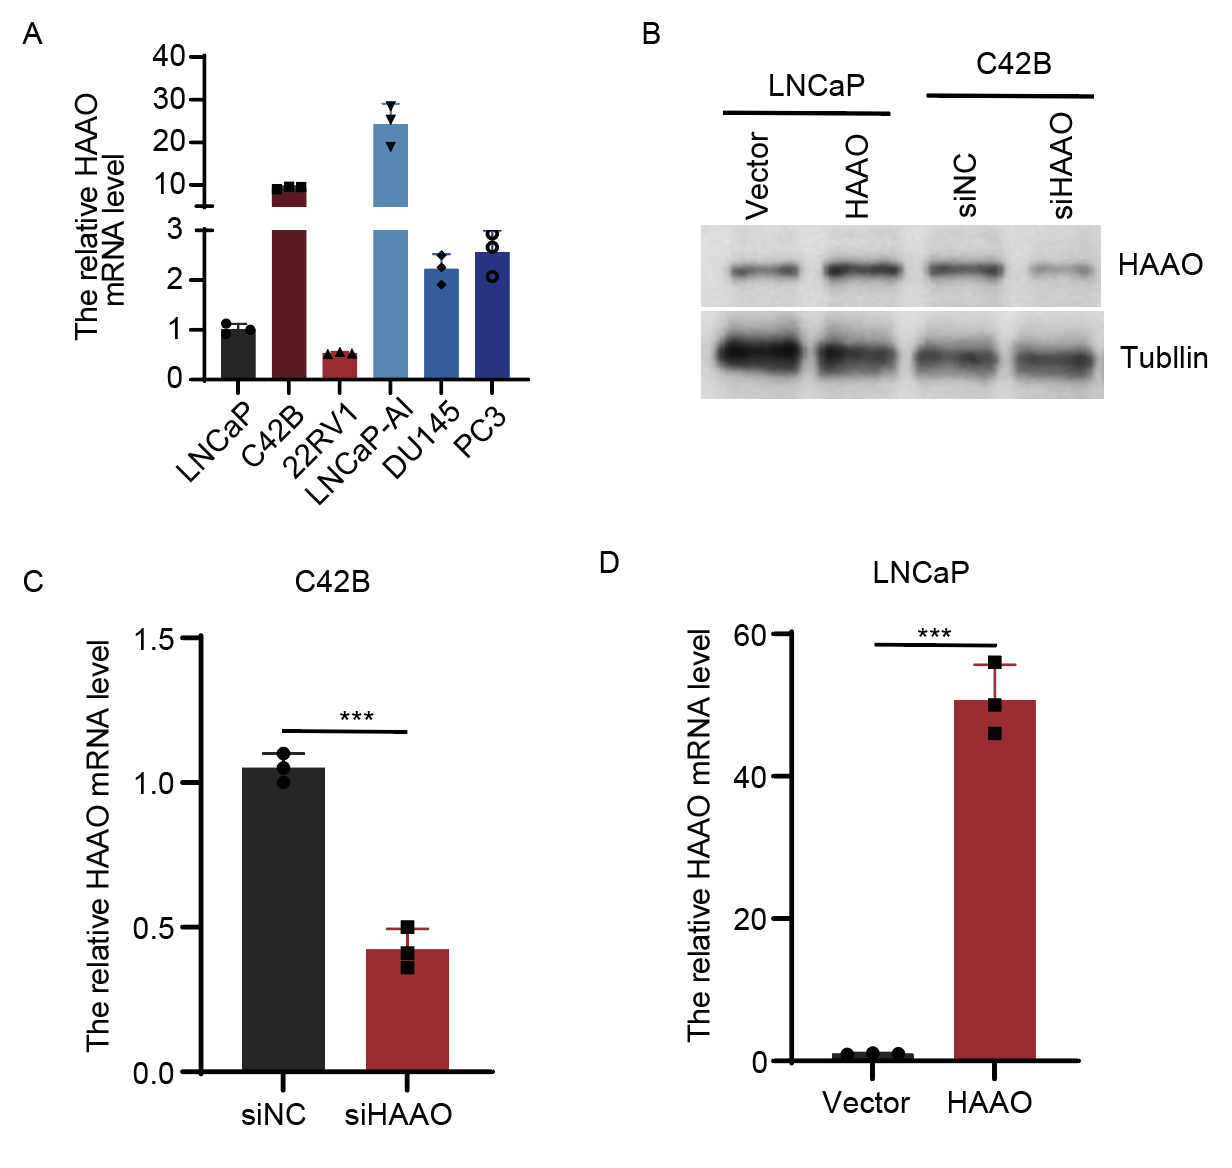
**

**Figure S2. Validation of HAAO overexpression and knockdown at the protein and mRNA levels. (A)** Relative mRNA levels of HAAO in prostate cancer cells**. (B)** Western blot analysis of HAAO level in HAAO-OE LNCaP and siHAAO C4-2B. **(C)** The relative HAAO mRNA level in siHAAO C4-2B cells. Data are presented as mean ± SD. Unpaired two-tailed Student’s t-test used for comparison. ∗∗∗p < 0.001. **(D)** The relative HAAO mRNA level in HAAO-OE LNCaP cells. Data are presented as mean ± SD. Unpaired two-tailed Student’s t-test used for comparison. ∗∗∗p < 0.001.

**Figure S3**

**
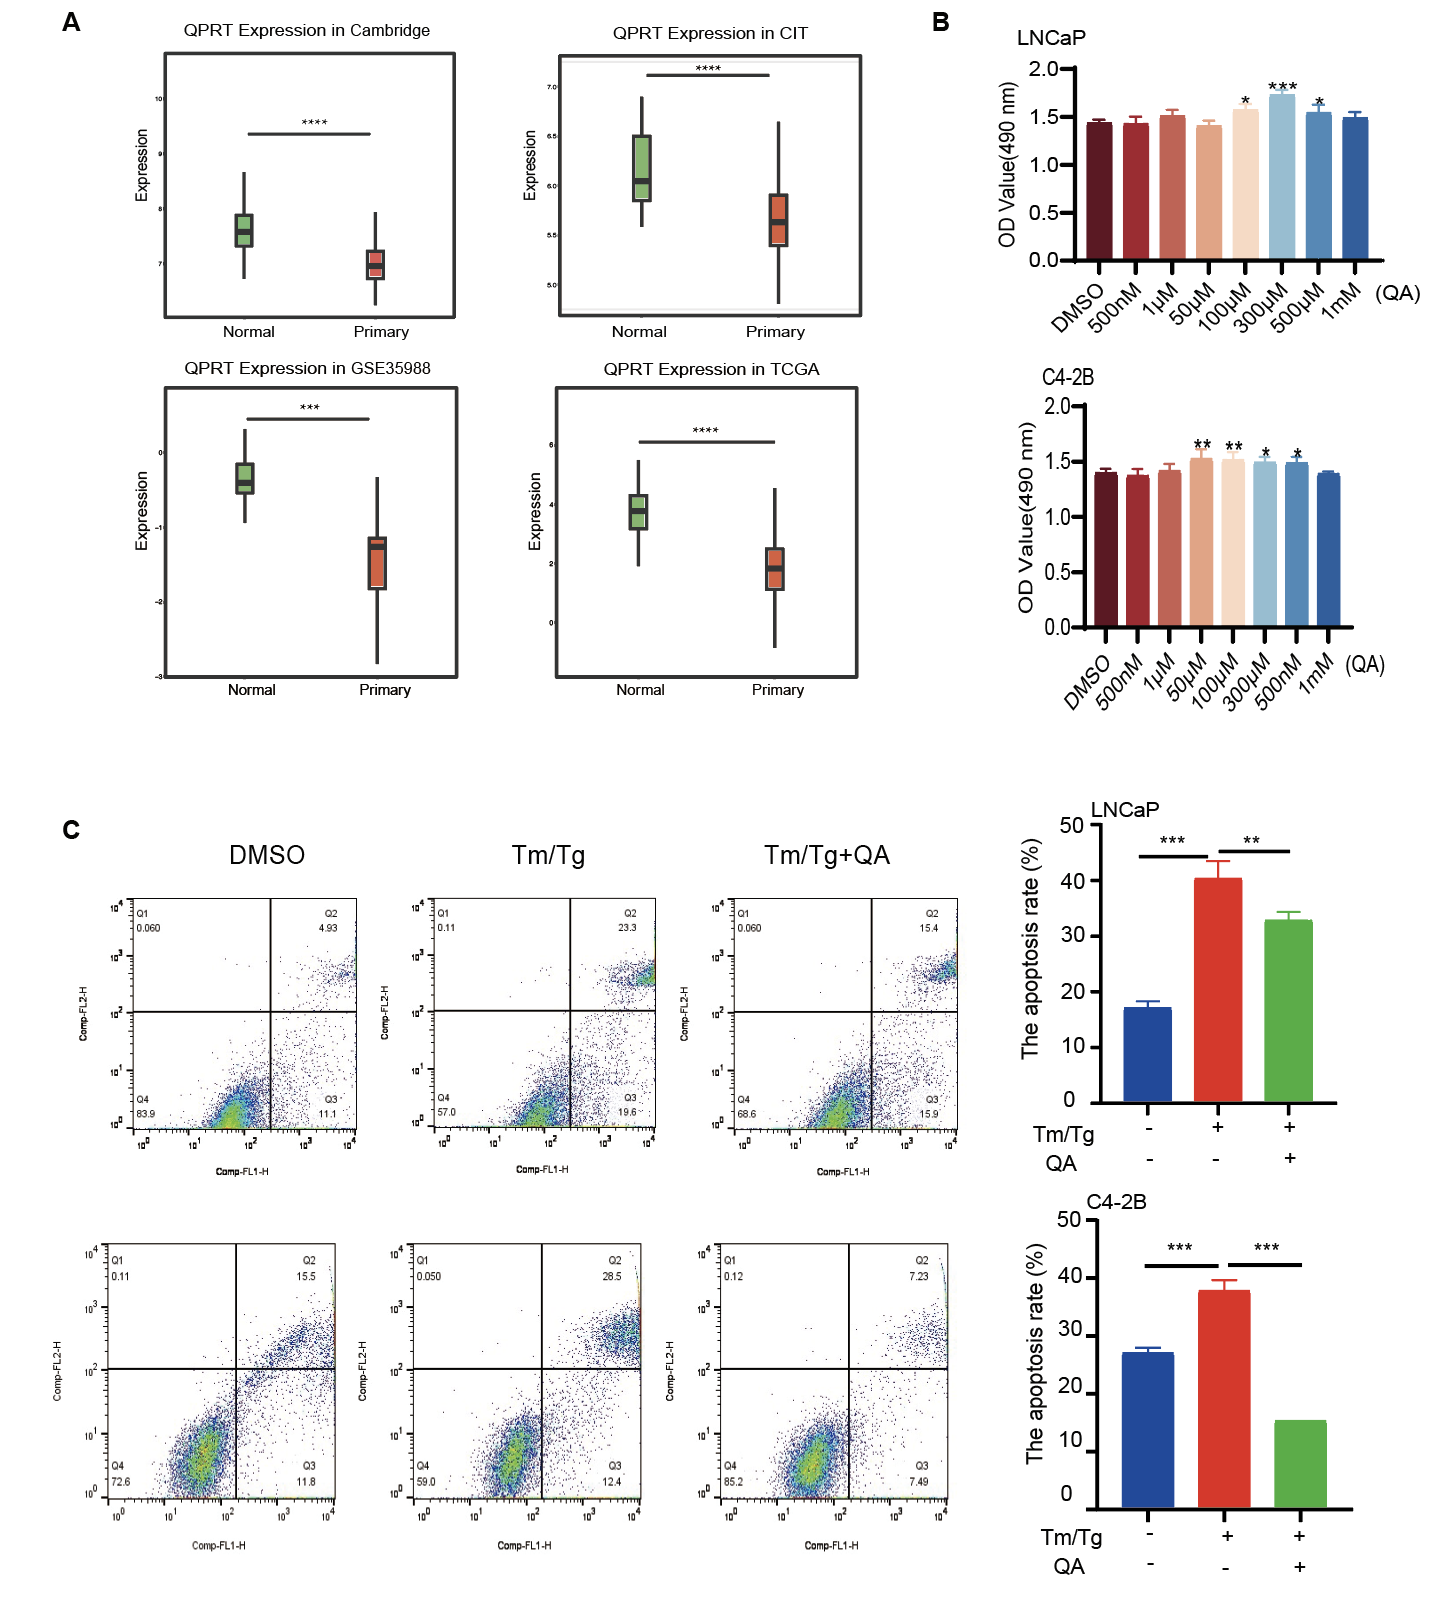
**

**(A)** Box plot showing QPRT expression in primary vs normal tissue of prostate cancer patients across different datasets. Wilcoxon rank-sum test used for comparison, ***p < 0.001, ****p < 0.0001. **(B)** Bar plot showing the OD values (490 nm) of LNCaP and C4-2B cells treated with different QA concentrations. Data are presented as mean ± SD. Unpaired two-tailed Student’s t-test used for comparison. ∗p < 0.05, ∗∗p < 0.01, ∗∗∗p < 0.001. **(C)** Flow cytometry analysis showing the apoptosis levels of LNCaP and C4-2B cells after Tm/Tg induced apoptosis, with or without QA treatment. Data are presented as mean ± SD, and endpoint data were analyzed using one-way ANOVA followed by Dunnett’s test for multiple comparisons. ∗∗p < 0.01, ∗∗∗p < 0.001.

**Figure S4**

**
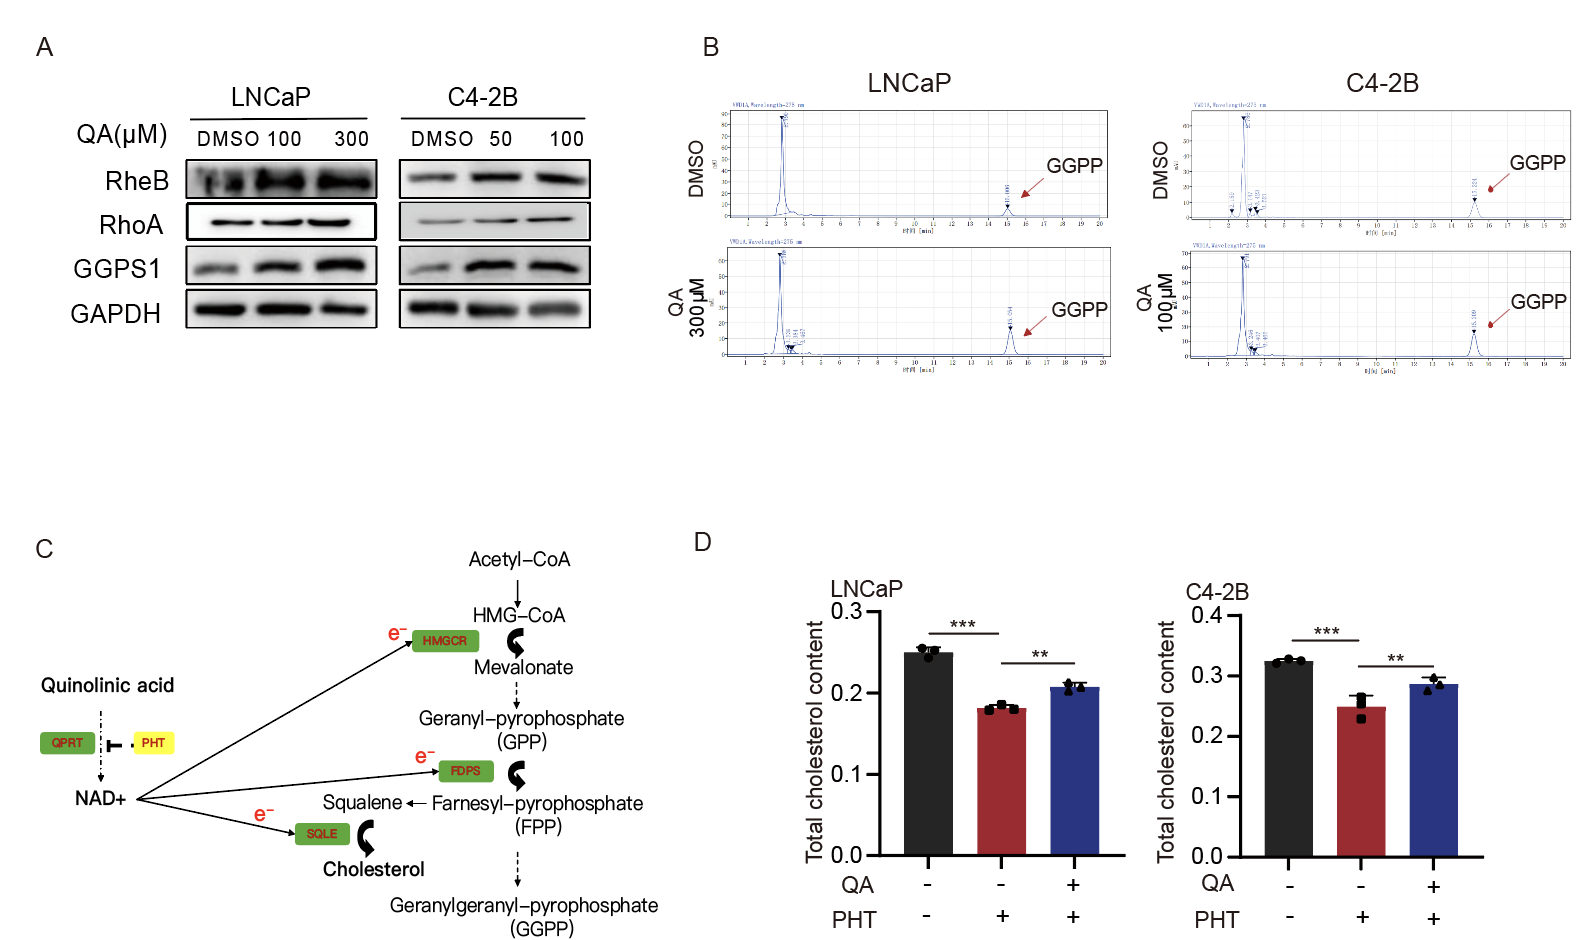
**

**Figure S4. QA modulates the MVA pathway in prostate cancer cells. (A)** Western blot analysis showing the expression of MVA pathway proteins in LNCaP and C4-2B cells treated with different QA concentrations. **(B)** GGPP levels of LNCaP and C4-2B cells treated with QA. **(C)** Schematic diagram showing the crosstalk between the kynurenine pathway and the mevalonate (MVA) pathway**. (D)** Bar chart show results from LNCaP and C42B cells treated under three conditions: (1) no QA or PHT; (2) PHT only; and (3) QA + PHT with simultaneous measurement of cholesterol levels.

**Figure S5**

**
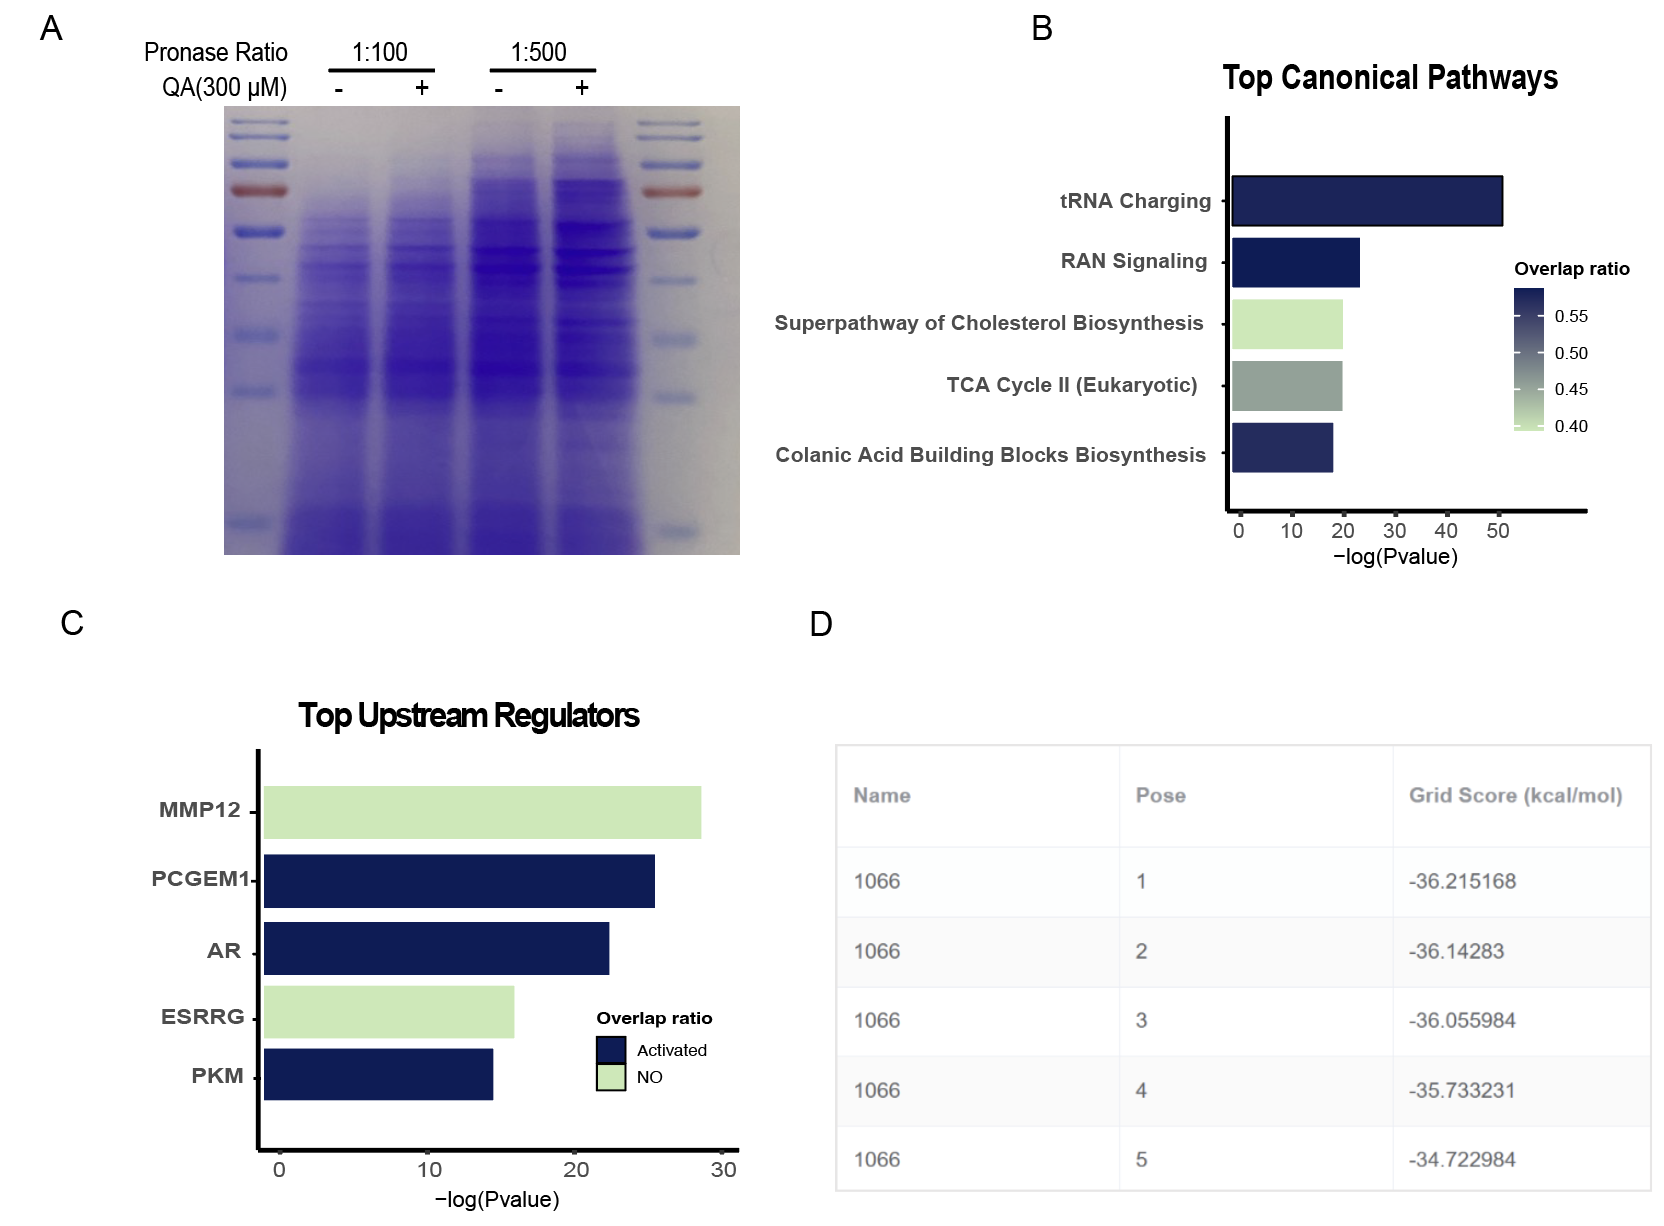
**

**Figure S5. QA associated proteomic and structural analyses. (A)** LNCaP cells were treated with 300 µM quinolinic acid (QA), followed by protease digestion of the cell lysates and Coomassie Brilliant Blue staining. **(B)** IPA analysis showing the top canonical pathways in LNCaP cells treated with QA. **(C)** IPA analysis showing the top canonical transcription factor in LNCaP cells treated with QA. **(D)** Molecular docking model showing the relative binding affinities of quinolinic acid at different sites.

**Figure S6**


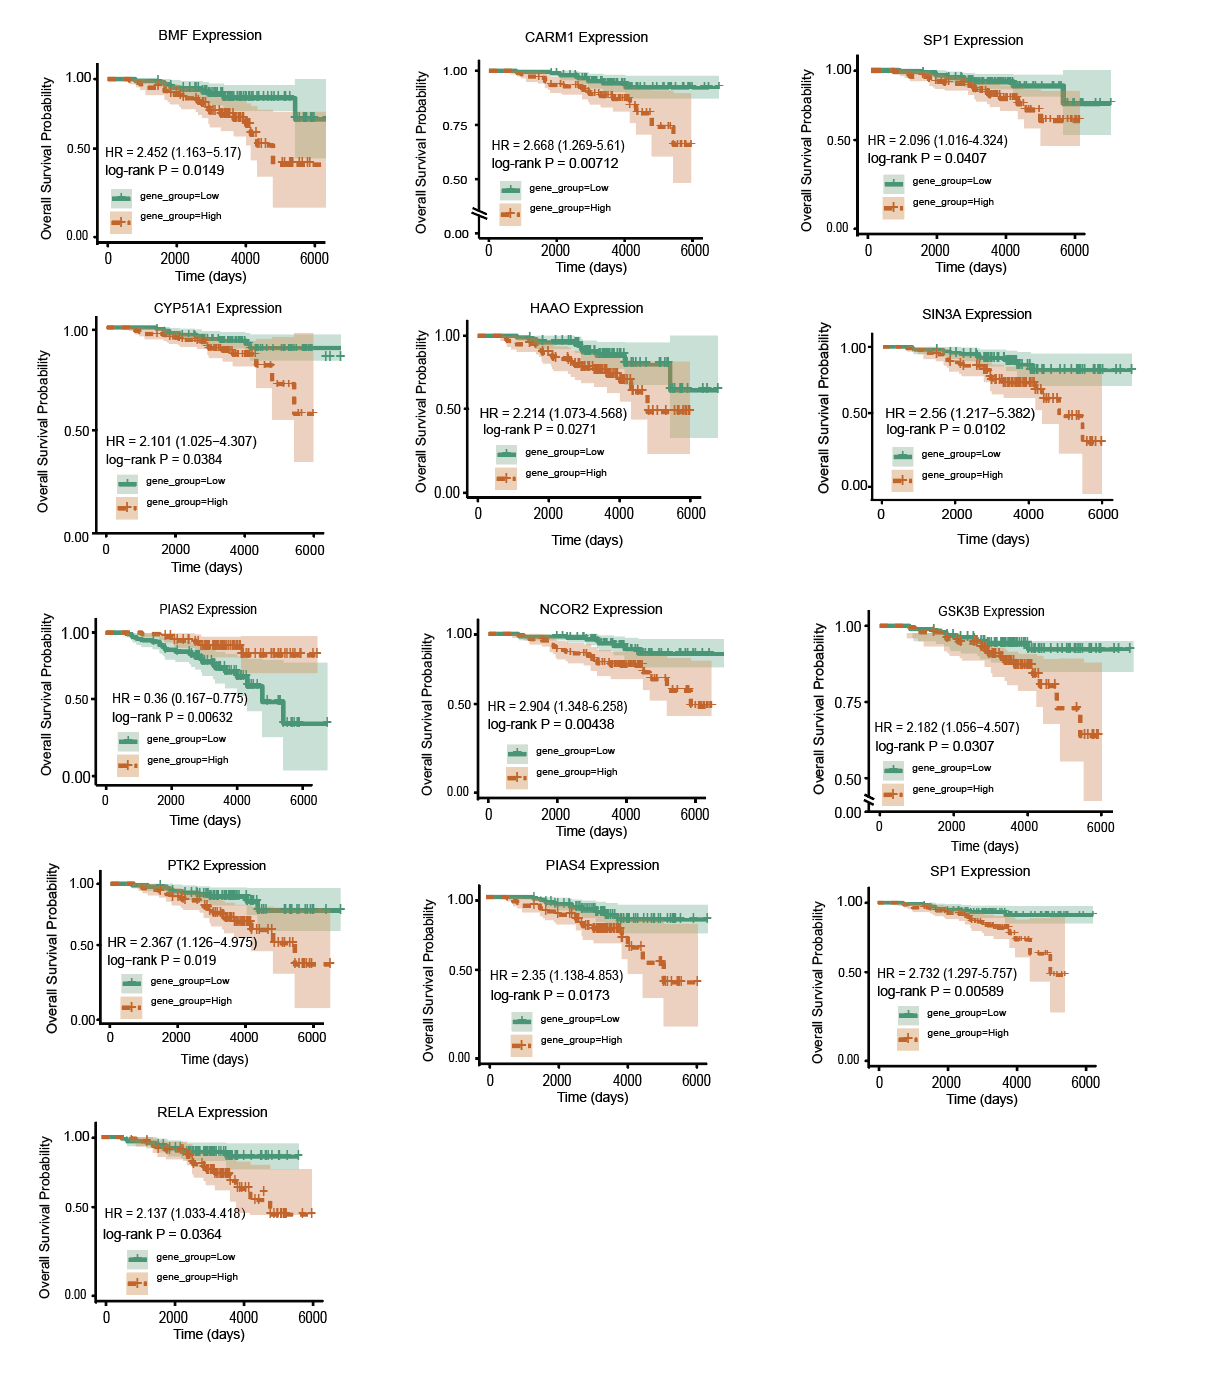


**Figure S6. Kaplan–Meier survival analysis of genes stratified by high and low expression. (A)** Kaplan-Meier survival of high and low expression groups of survival-related genes.

**Table S1. Single cell RNAseq datastes**

| **Dataset** | **Patient ID** | **SampleID** | **Stage（TNM）** | **PSA** | **Gleason score** | **Site of Biopsy** |
| --- | --- | --- | --- | --- | --- | --- |
| **GSE137829** | **P1** | **GSM4089151-P1** | **cT2cN0M0** | **8.88** | **4+5=9** | **Prostate** |
| **P2** | **GSM4089152-P2** | **cT3bN1M0** | **56.53** | **7(4+3)** | **Prostate** |
| **P3** | **GSM4089153-P3** | **cT2cN0M0** | **55.16** | **8(4+4)** | **Prostate** |
| **P4** | **GSM4089154-P4** | **cT4N0M0** | **149** | **7(4+3)** | **Prostate** |
| **P5** | **GSM4089155-P5** | **cT3bN1M1a** | **15.6** | **8(4+4)** | **Prostate** |
| **P6** | **GSM4089156-P6** | **cT4N1M1** | **72.72** | **Small-cell NEPC** | **Prostate** |
| **GSE141445** | **P7** | **GSM4203181-1** | **cT4N1M0** | **79.44** | **9(4+5)** | **Prostate** |
| **P8** | **GSM4203181-2** | **cT4N0M0** | **18.51** | **10(5+5)** | **Prostate** |
| **P9** | **GSM4203181-3** | **cT3aN0M0** | **7.05** | **9(4+5)** | **Prostate** |
| **P10** | **GSM4203181-4** | **cT3aN0M0** | **22.57** | **9(4+5)** | **Prostate** |
| **P11** | **GSM4203181-5** | **cT2cN0M0** | **10.5** | **7(4+3)** | **Prostate** |
| **P12** | **GSM4203181-6** | **cT2cN1M0** | **336** | **7(4+3)** | **Prostate** |
| **P13** | **GSM4203181-7** | **cT2cN1M1b** | **16** | **9(4+5)** | **Prostate** |
| **P14** | **GSM4203181-8** | **cT2cN1M1b** | **16** | **9(4+5)** | **Prostate** |
| **P15** | **GSM4203181-9** | **cT2cN0M0** | **20** | **9(4+5)** | **Prostate** |
| **P16** | **GSM4203181-10** | **cT2cN0M0** | **81.09** | **7 (3 + 4)** | **Prostate** |
| **P17** | **GSM4203181-11** | **cT3aN0M1b** | **19** | **9(4+5)** | **Prostate** |
| **P18** | **GSM4203181-12** | **cT3aN0M0** | **51** | **7(4+3)** | **Prostate** |
| **P19** | **GSM4203181-13** | **cT2bN0M1a** | **14** | **9(4+5)** | **Lymph node** |
| **GSE157703** | **P20** | **GSM4773521_PCa1** | **pT2N0** | **NA** | **6 (3 + 3)** | **Prostate** |
| **P21** | **GSM4773522_PCa2** | **pT3aN1** | **NA** | **7 (3 + 4)** | **Prostate** |
| **GSE193337** | **P22** | **GSM5793828_P1t** | **pT2cN0** | **20** | **NA** | **Prostate** |
| **P23** | **GSM5793829_P2t** | **pT2aN0** | **2.4** | **NA** | **Prostate** |
| **P24** | **GSM5793831_P3t** | **pT3aN0** | **14** | **NA** | **Prostate** |
| **P25** | **GSM5793832_P4t** | **pT3bN0** | **2.32** | **NA** | **Prostate** |
| **GSE264573** | **P26** | **GSM8222914_HMP22** | **NA** | **NA** | **NA** | **Lymph node** |
| **P27** | **GSM8222915_HMP23A** | **NA** | **NA** | **NA** | **Prostate** |
| **P28** | **GSM8222916_HMP23B** | **NA** | **NA** | **NA** | **Prostate** |
| **P29** | **GSM8222917_HMP24** | **NA** | **NA** | **NA** | **Pelvic Mass** |
| **PMID35789834** | **P30** | **PMID35789834-P1** | **cT3bN1M1b** | **8.63** | **9(4+5)** | **Lymph node** |
| **P31** | **PMID35789834-P2** | **cT1cNxMx** | **6.39** | **9(4+5)** | **Prostate** |
| **P32** | **PMID35789834-P3** | **cT3bN1M0** | **71.64** | **9(4+5)** | **Lymph node** |
| **P33** | **PMID35789834-P6** | **cT3bN1M1b** | **147.71** | **9(4+5)** | **Prostate** |
| **GSE176031** | **P34** | **GSM5353232_PA_PR5249_T1_S3** | **cT2b** | **5.2** | **7 (3 + 4)** | **left lateral gland** |
| **GSM5353233_PA_PR5249_T2_S4** |
| **P35** | **GSM5353236_PA_PR5251_T1_S7** | **cT2c** | **7.7** | **7 (3 + 4)** | **left mid** |
| **GSM5353237_PA_PR5251_T2_S8** |
| **P36** | **GSM5353240_PA_PR5254_T1_S15** | **cT2a** | **7.8** | **7(4+3)** | **left mid** |
| **P37** | **GSM5353243_PA_PR5261_T1_S23** | **cT2a** | **3.89** | **7 (3 + 4)** | **central mid towards apex** |
| **GSM5353244_PA_PR5261_T1_S24** |
| **P38** | **GSM5353245_PA_PR5269_1_S25** | **cT1c** | **4.1** | **7 (3 + 4)** | **NA** |
| **GSM5353246_PA_PR5269_2_S26** |
| **GSM5353247_PA_PR5269_3_S27** |
| **GSM5353248_PA_PR5269_4_S28** |

**Table S2. Gene expression signatures related to tryptophan metabolism**

| Kynurenine pathway | 5-hydroxytryptamine (5-HT) pathways |
| --- | --- |
| AFMID | TPH1 |
| HAAO | TPH2 |
| IDO1 | AADC |
| IDO2 | MAO |
| KMO | AANAT |
| KYNU | ASMT |

**Table S3. Antibodies**

| Antibody Target | Source | Application |
| --- | --- | --- |
| GAPDH | Selleckchem;Catalog No.: F0003 | WB |
| HMGCS1 | ABclonal;Catalog No.:A3916 | WB |
| HMGCR | ABclonal;Catalog No.:A1633 | WB |
| MVK | ABclonal;Catalog No.:A20906 | WB |
| FDPS | ABclonal;Catalog No.:A23475 | WB |
| RheB | ABclonal;Catalog No.:A1165 | WB |
| RhoA | ABclonal;Catalog No.:A0272 | WB |
| GGPS1 | ABclonal;Catalog No.:A16233 | WB |
| Rap1A | Thermo Fisher;Catalog No.:MA5-17164 | WB |
| Tubulin | Thermo Fisher;Catalog No.:MA5-16308 | WB |
| AR | Thermo Fisher;Catalog No.:MA5-13426 | WB |
| PSA | Thermo Fisher;Catalog No.:MA1-10447 | WB |
| Lamin B1 | Thermo Fisher;Catalog No.:702972 | WB |
| FDFT1 | Thermo Fisher;Catalog No.:MA5-44872 | WB |

**Table S4. Primers**

| Gene Name | Sequence (5´to 3´) |
| --- | --- |
| GAPDH | F: CTT GTG TTC GCT CCC AGG CAT A |
| R: GGC TGT TGT CAT ACT TCT CAT GG |
| HAAO | F: CCT GAG ACA GAA TG TGG ACG TG |
| R: CTT GTG TTC GCT CCC AGG CAT A |
| PSA | F: GAC CAA GTT CAT GCT GTG TGC |
| R: CCA CTC ACC TTTCCC CTC AAG |
| TMPRSS2 | F: CAA GTG CTC CAA CTC TGG GAT |
| R: AAC ACA CCG ATT CTC GTC CTC |
| S100P | F: AAG GAT GCC GTG GAT AAA TTG C |
| R: ACA CGA TGA ACT CAC TGA AGT C |
| KLK2 | F: TCA GAG CCT GCC AAG ATC AC |
| R: CAC AAG TGT CTT TAC CAC CTG T |

**Table S5. siRNAs.**

| siRNA | Sequence (5´to 3´) |
| --- | --- |
| siHAAO | CGAAGAGGGUGAAGAGGUATTUACCUCUUCACCCUCUUCGTT |
| GAGCAGUACAGAACAGGAATTUUCCUGUUCUGUACUGCUCTT |
| siFDPS | CCAGAAUUCAGAUGUUUAUTT |
| CCAUCAAUGAUGCUAACCUTT |

**Table S6. Risk genes**

| ENSG | Gene | Hazard Ratio | CI_Low | CI_Up | Pvalue | Beta |
| --- | --- | --- | --- | --- | --- | --- |
| ENSG00000196498 | NCOR2 | 2.904 | 1.348 | 6.258 | 0.0044 | 1.066089 |
| ENSG00000185591 | SP1 | 2.732 | 1.297 | 5.757 | 0.0059 | 1.005034 |
| ENSG00000078043 | PIAS2 | 0.36 | 0.167 | 0.775 | 0.0063 | -1.02165 |
| ENSG00000142453 | CARM1 | 2.668 | 1.269 | 5.61 | 0.0071 | 0.981329 |
| ENSG00000169375 | SIN3A | 2.56 | 1.217 | 5.382 | 0.0102 | 0.940007 |
| ENSG00000104081 | BMF | 2.452 | 1.163 | 5.17 | 0.0149 | 0.896904 |
| ENSG00000105229 | PIAS4 | 2.35 | 1.138 | 4.853 | 0.0173 | 0.854415 |
| ENSG00000169398 | PTK2 | 2.367 | 1.126 | 4.975 | 0.019 | 0.861623 |
| ENSG00000162882 | HAAO | 2.214 | 1.073 | 4.568 | 0.0271 | 0.794801 |
| ENSG00000082701 | GSK3B | 2.182 | 1.056 | 4.507 | 0.0307 | 0.780242 |
| ENSG00000173039 | RELA | 2.137 | 1.033 | 4.418 | 0.0364 | 0.759403 |
| ENSG00000001630 | CYP51A1 | 2.101 | 1.025 | 4.307 | 0.0384 | 0.742413 |
| ENSG00000103275 | UBE2I | 2.096 | 1.016 | 4.324 | 0.0407 | 0.740031 |
